# Supplementary material for: Electrochemical Immunosensor for the Simultaneous Determination of Two Main Peanut Allergenic Proteins (Ara h 1 and Ara h 6) in Food Matrices
Source: MDPI journal article supplement (doi:10.3390/foods10081718), 2021-07-25
Supplement: s1 [file s1]

# Supplementary Material

## Electrochemical Immunosensor for the Simultaneous Determination of Two Main Peanut Allergenic Proteins (Ara h 1 and Ara h 6) in Food Matrices

Maria Freitas <sup>1,†</sup>, Marta M. P. S. Neves <sup>1,2,†</sup>, Henri P. A. Nouws <sup>1,\*</sup> and Cristina Delerue-Matos <sup>1</sup>

<sup>1</sup> REQUIMTE/LAQV, Instituto Superior de Engenharia do Porto, Instituto Politécnico do Porto, Rua Dr. António Bernardino de Almeida 431, 4200-072 Porto, Portugal; maria.freitas@isep.ipp.pt (M.F.); marta.pereira-da-silva-neves@warwick.ac.uk (M.M.P.S.N.); cmm@isep.ipp.pt (C.D.-M.)

<sup>2</sup> Institute of Advanced Study, Department of Chemistry, University of Warwick, Coventry CV4 7AL, UK

\* Correspondence: han@isep.ipp.pt

† Both authors contributed equally to this work.

### Contents

|                 |    |
|-----------------|----|
| Figure S1 ..... | S2 |
| Figure S2 ..... | S3 |
| Figure S3 ..... | S3 |
| Figure S4 ..... | S4 |
| Figure S5 ..... | S5 |
| Figure S6 ..... | S5 |
| Figure S7 ..... | S6 |
| Table S1 .....  | S2 |
| Table S2 .....  | S4 |

**Table S1.** Optimized experimental parameters, tested range, and selected values.

| Experimental variable                      | Tested range | Selected value |
|--------------------------------------------|--------------|----------------|
| [CAb] ( $\mu\text{g}\cdot\text{mL}^{-1}$ ) | 10 – 25      | 25             |
| [DAb] (Dilution Factor)                    | 100 – 500    | 250            |
| BSA addition to DAb (%)                    | 0.0 – 1.0    | 1.0            |
| BSA addition to STR-ALP (%)                | 0.1 – 1.0    | 0.1            |
| t (Ara h 1 & Ara h 6) (min)                | 30 – 60      | 60             |
| t (DAb) (min)                              | 30 – 60      | 30             |
| Temperature ( $^{\circ}\text{C}$ )         | 25 – 30      | 30             |

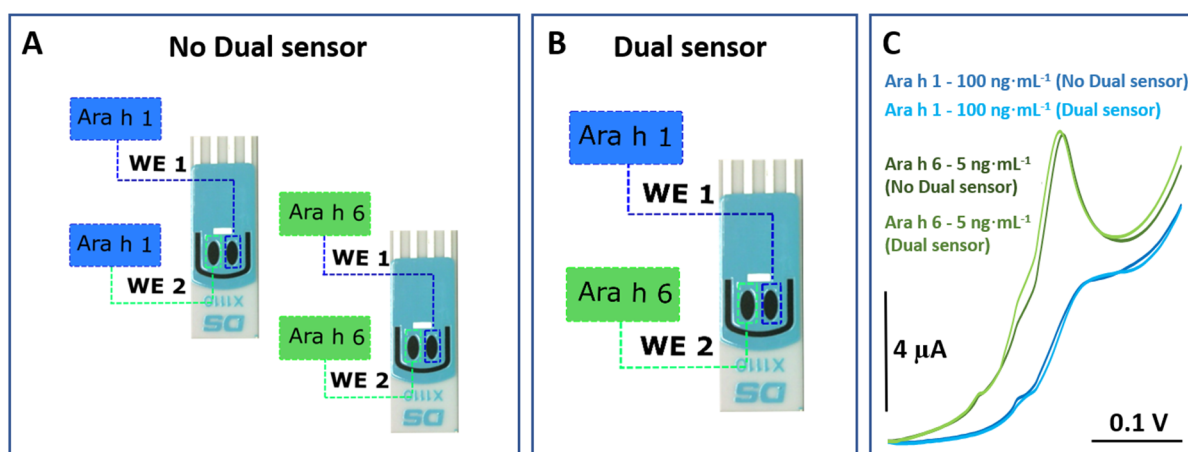

**Figure S1.** Schematic representation of the detection of Ara h 1 and Ara h 6 using a (A) No Dual sensor and (B) Dual sensor. (C) LSV voltammograms of the 'No Dual' and the Dual sensor (Ara h 1: 100-ng mL<sup>-1</sup> and Ara h 6: 5 ng·mL<sup>-1</sup>).

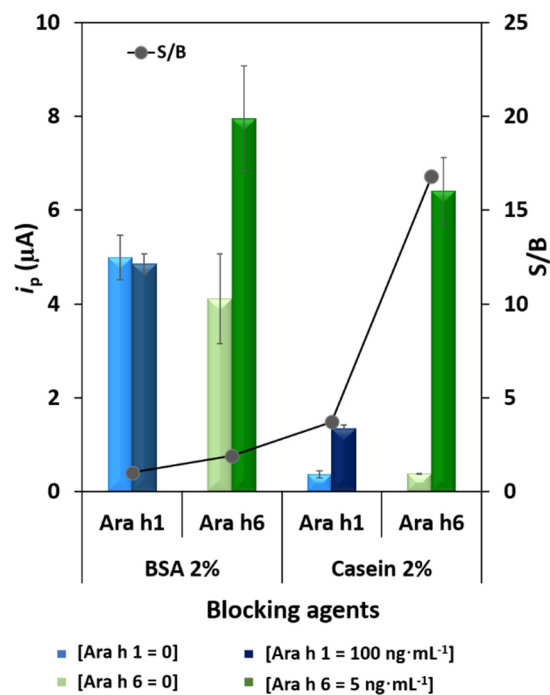

**Figure S2.** Study of the blocking agents BSA (2% (w/v)) and casein (2% (w/v)) and evaluation of non-specific adsorptions. (Ara h 1: 0 (blank) and 100 ng·mL<sup>-1</sup>; Ara h 6: 0 (blank) and 5 ng·mL<sup>-1</sup>; error bars correspond to the standard deviation of 3 replicates).

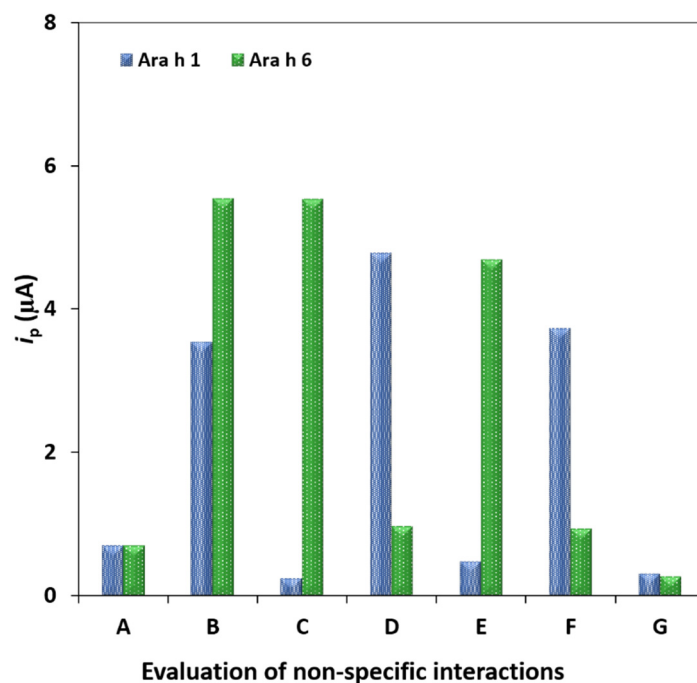

**Figure S3.** Effect of non-specific adsorptions of the target proteins and the capture and detection antibodies. (A) Blank and (B) 250 ng·mL<sup>-1</sup> Ara h 1 and 2.5 ng·mL<sup>-1</sup> Ara h 6 (control assays), Assays without the use of: Ara h 1 CAb (C), Ara h 6 CAb (D), Ara h 1 DAb (E), Ara h 6 DAb (F), Ara h 1 DAb and Ara h 6 DAb (G). (Ara h 1: 250 ng mL<sup>-1</sup>; Ara h 6: 2.5 ng·mL<sup>-1</sup>).

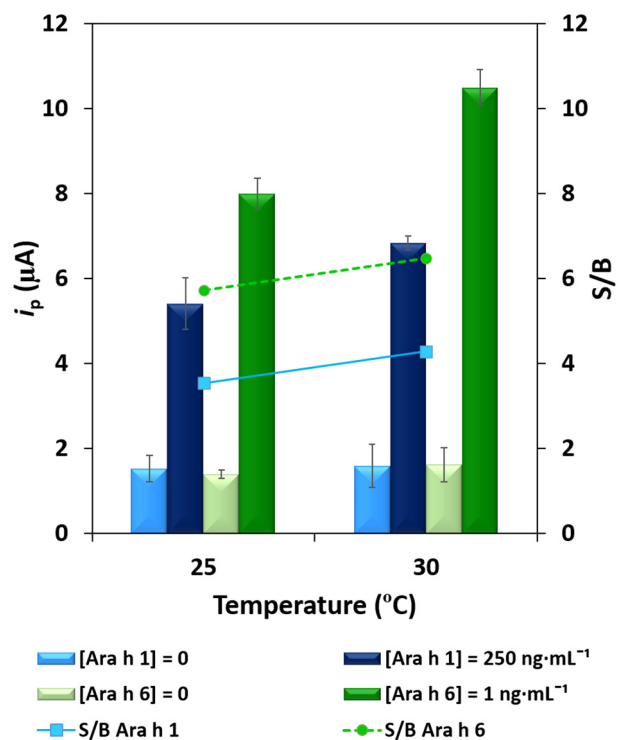

**Figure S4.** Current intensities obtained at 25 °C and 30 °C. (Ara h 1: 0 (blank) and 250 ng·mL<sup>-1</sup>; Ara h 6: 0 (blank) and 1 ng·mL<sup>-1</sup>; error bars correspond to the standard deviation of 3 replicates).

**Table S2.** Figures of merit of the immunoassay

| Figure of merit                                                     | Ara h 1   | Ara h 6     |
|---------------------------------------------------------------------|-----------|-------------|
| Concentration interval (ng·mL <sup>-1</sup> )                       | 25 - 1000 | 0.050 - 1.0 |
| Correlation coefficient (r)                                         | 0.997     | 0.998       |
| Slope (m) (μA mL ng <sup>-1</sup> )                                 | 0.0111    | 7.10        |
| Standard deviation of the slope ( $S_m$ ) (μA mL ng <sup>-1</sup> ) | 0.0004    | 0.28        |
| Intercept (b) (μA)                                                  | 0.72      | 0.28        |
| Standard deviation of the intercept ( $S_a$ ) (μA)                  | 0.21      | 0.17        |
| Standard deviation of the method ( $S_{x0}$ )                       | 33.7      | 0.032       |
| Coefficient of variation of the method ( $V_{x0}$ ) (%)             | 10.5      | 3.31        |
| Limit of detection (LOD) (ng·mL <sup>-1</sup> )                     | 5.2       | 0.017       |
| Limit of quantification (LOQ) (ng·mL <sup>-1</sup> )                | 17        | 0.055       |

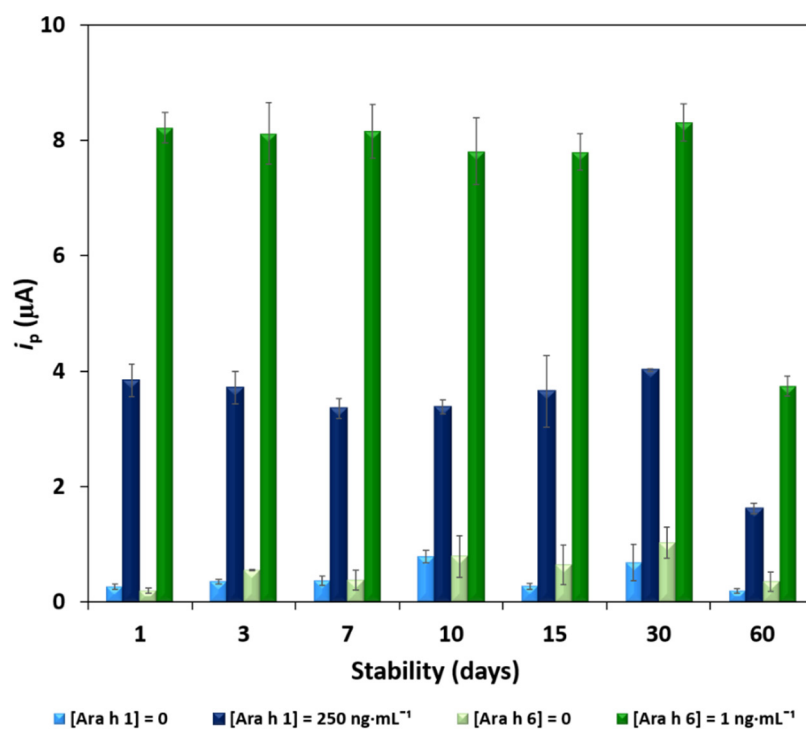

**Figure S5.** Storage stability of the immunosensor (Ara h 1 (0 (blank) and 250 ng·mL<sup>-1</sup>) and Ara h 6 (0 (blank) and 1 ng·mL<sup>-1</sup>); error bars correspond to the standard deviation of 3 replicates).

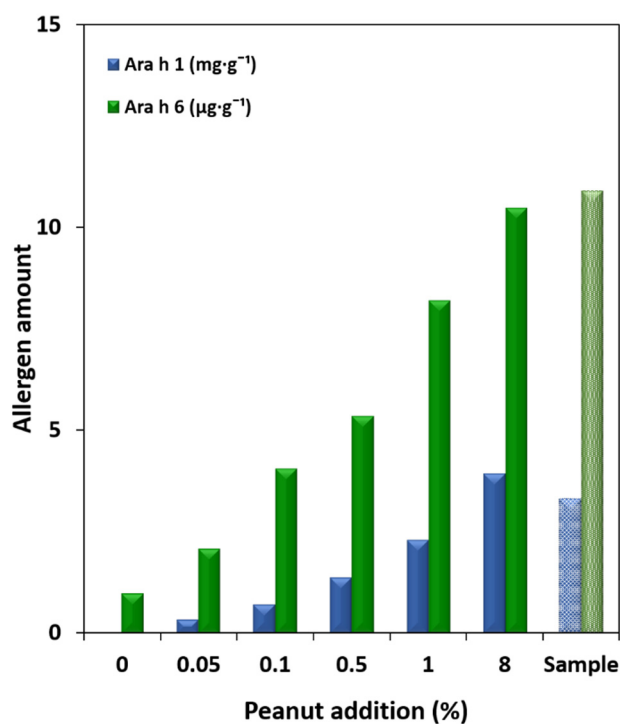

**Figure S6.** Quantification of Ara h 1 (mg·g<sup>-1</sup>) and Ara h 6 (mg·g<sup>-1</sup>) extracted from an allergen-free cookie sample spiked with increasing amounts of peanut and a peanut cookie.

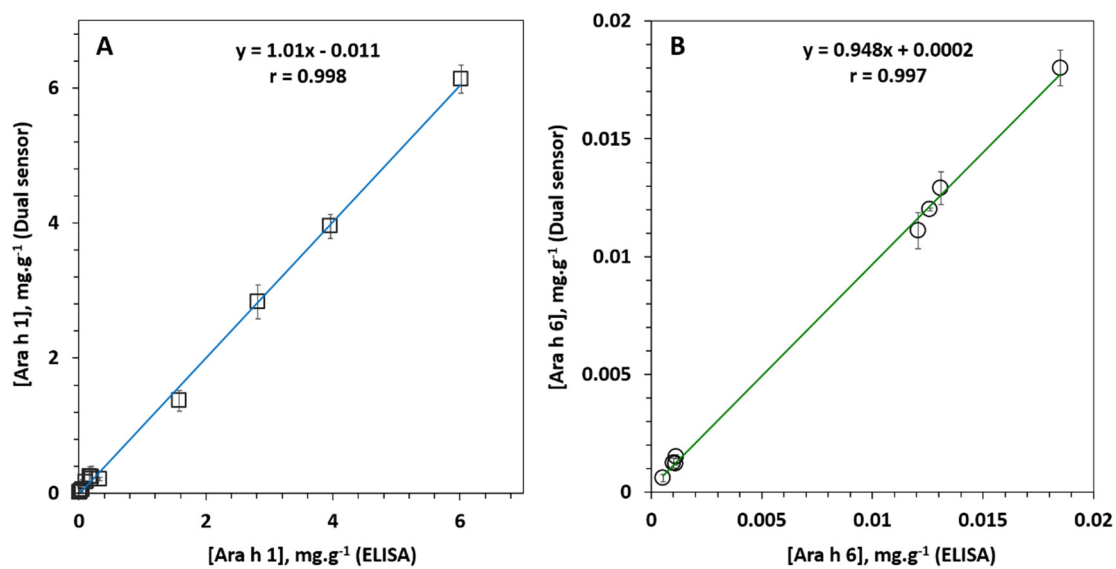

**Figure S7.** Correlation plots for the analysis of (A) Ara h 1 and (B) Ara h 6 in the tested food products using the developed immunosensor and ELISA kits. Error bars correspond to the standard deviation of 3 replicates.
